# Supplementary material for: Hierarchical NiCo2O4/Co3O4/NiO porous composite: a lightweight electromagnetic wave absorber with tunable absorbing performance
Source: Royal Society of Chemistry journal article supplement (doi:10.1039/c6tc05167g), 2017-01-01
Supplement: c6tc05167g1.pdf [file c6tc05167g1.pdf]

## Supplementary Information

### **Hierarchical $\text{NiCo}_2\text{O}_4/\text{Co}_3\text{O}_4/\text{NiO}$ porous composite: a lightweight electromagnetic wave absorber with tunable absorbing performance†**

Xiaofang Liu <sup>a,\*</sup>, Chengcheng Hao <sup>a</sup>, He Jiang <sup>b</sup>, Min Zeng <sup>a</sup>, and Ronghai Yu <sup>a</sup>

<sup>a</sup>*School of Materials Science and Engineering, Beihang University, Beijing 100191, China.*

<sup>b</sup>*Center of testing and analyzing, School of materials science and Engineering, Tsinghua University, Beijing 100191, China.*

\*Corresponding author: Xiaofang Liu; E-mail address: liuxf05@buaa.edu.cn.

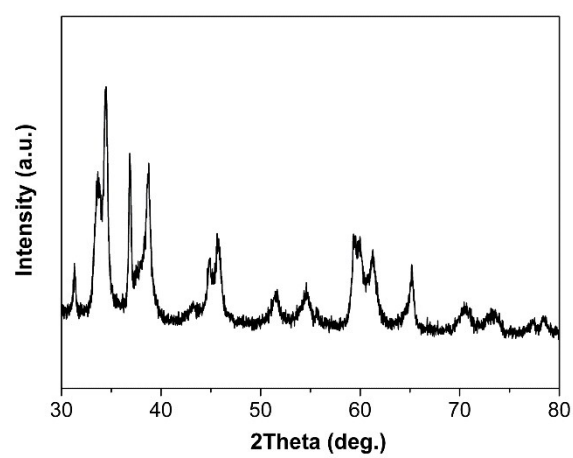

**Fig. S1** XRD pattern of the precursor.

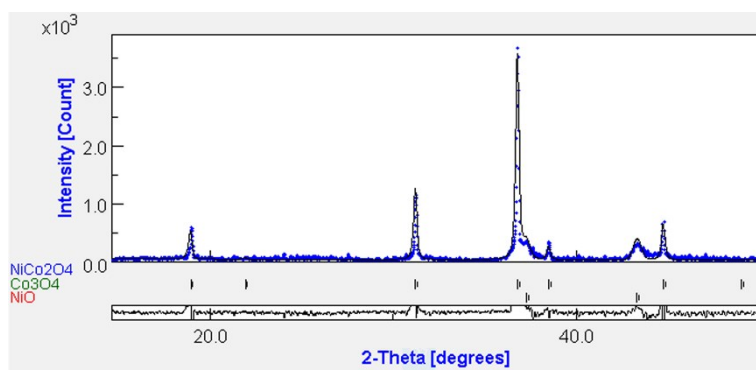

**Fig. S2** XRD pattern and Rietveld analysis pattern of  $\text{NiCo}_2\text{O}_4/\text{Co}_3\text{O}_4/\text{NiO}$ .
